# Supplementary material for: Photoelectric properties and charge dynamics for a set of solid state solar cells with Cu4Bi4S9 as the absorber layer
Source: Royal Society of Chemistry journal article supplement (doi:10.1039/c3ta11830d), 2013-01-01
Supplement: c3ta11830d.pdf [file c3ta11830d.pdf]

## Supplementary Information

### Photoelectric properties and charge dynamics for a set of solid state solar cells with $\text{Cu}_4\text{Bi}_4\text{S}_9$ as absorber layer†

Xiangyang Liu,\*<sup>a</sup> Haiwu Zheng,<sup>a</sup> Jiwei Zhang,<sup>b</sup> Yin Xiao<sup>a</sup> and Zhiyong Wang<sup>a</sup>

<sup>a</sup>Key Laboratory of Photovoltaic Materials of Henan Province and School of Physics & Electronics, Henan University, Kaifeng 475004, P.R. China

<sup>b</sup> The Key Laboratory for Special Functional Materials of MOE, Henan University, Kaifeng 475004, P.R. China

E-mail: [lxy081276@126.com](mailto:lxy081276@126.com)

#### Supplementary Tables

**Table SI1** The efficiencies of four types of cells with different carrier mobility in sensitized electrodes.

| sensitized electrodes             | carrier mobility ( $\text{cm}^2\text{V}^{-1}\text{s}^{-1}$ ) | efficiency (%) | carrier mobility ( $\text{cm}^2\text{V}^{-1}\text{s}^{-1}$ ) | efficiency (%) |
|-----------------------------------|--------------------------------------------------------------|----------------|--------------------------------------------------------------|----------------|
| $\text{In}_2\text{O}_3$ electrode | 11.8                                                         | 5.6            | 14.2                                                         | 6.2            |
| ZnO electrode                     | 12.7                                                         | 4.2            | 16.4                                                         | 4.8            |
| $\text{TiO}_2$ electrode          | 26.4                                                         | 5.0            | 38.5                                                         | 5.5            |
| $\text{SnO}_2$ electrode          | 10.5                                                         | 3.3            | 12.6                                                         | 3.9            |

## Supplementary Figures

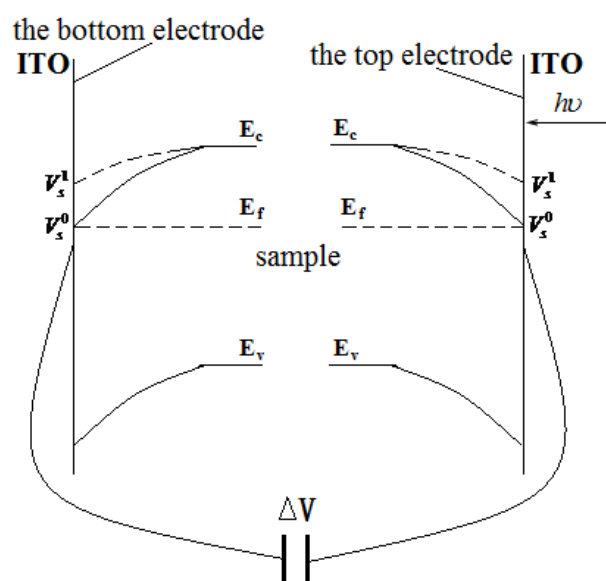

**Fig. SI1** The schematic diagram of sandwich structure consisting of ITO (indium tin oxide) and sample in the steady state and electric field induced-surface photovoltage spectroscopy. ( $E_c$ : the bottom of conduction band;  $E_v$ : the top of valence band;  $E_f$ : the Fermi energy level;  $\Delta V$ : the difference of different surface potential;  $V_s^0$ : the surface potential before illumination;  $V_s^1$ : the surface potential after illumination;  $V_s^0$ ,  $V_s^1 < 0$ ;  $h\nu$ : the incident photon energy).

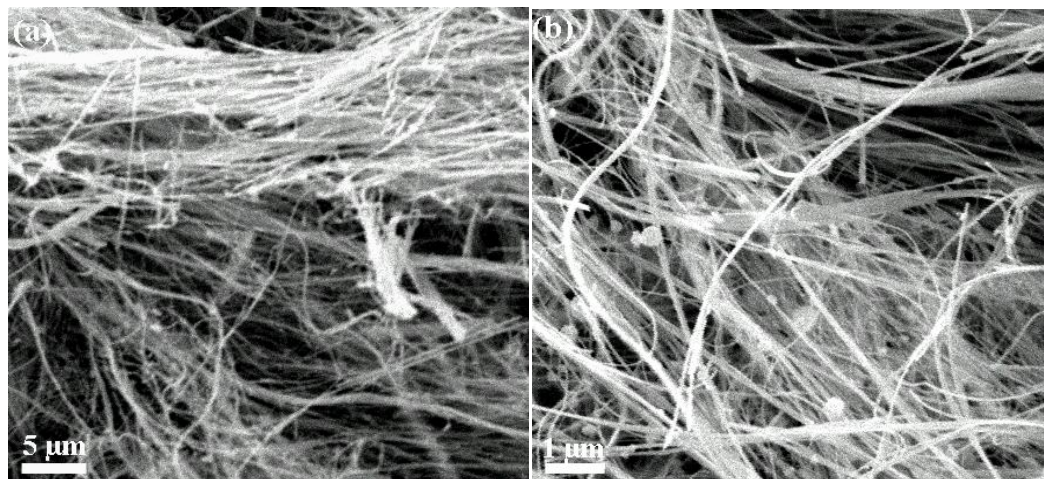

**Fig. SI2** ((a) and (b)) Low-magnification SEM images of CBS nanoribbons.

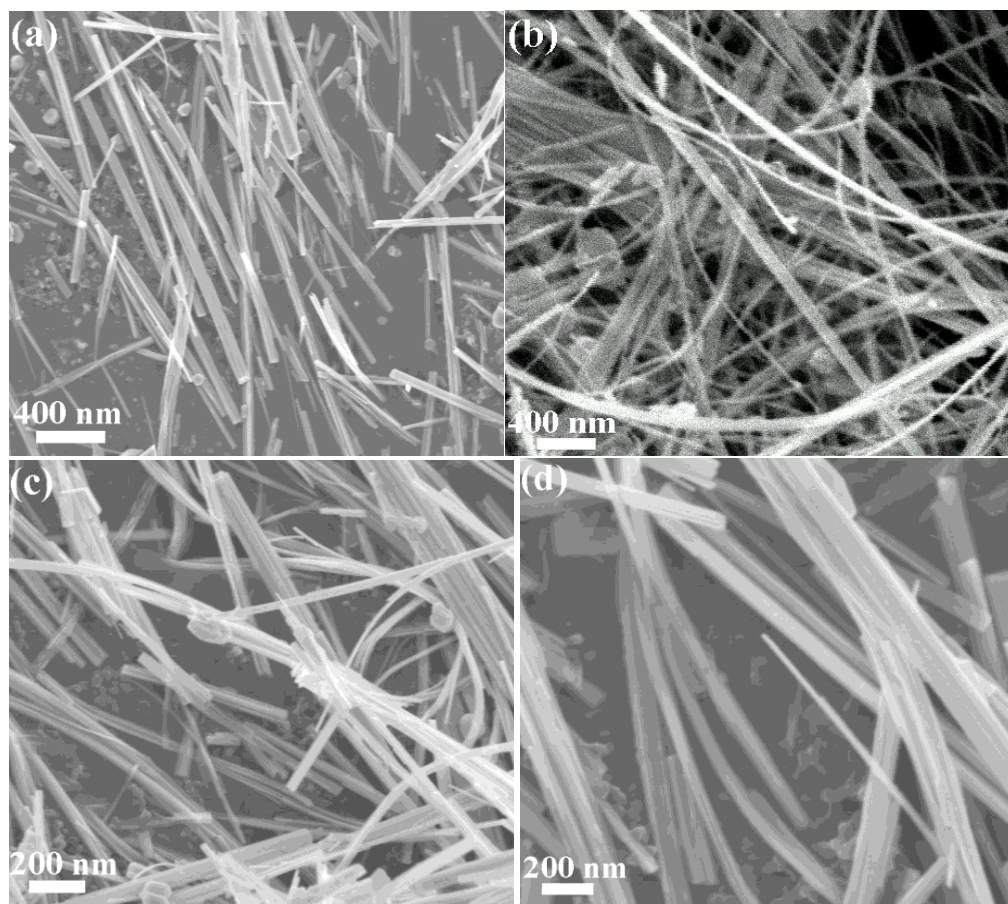

**Fig. SI3** ((a), (b), (c) and (d)) High-magnification SEM images of CBS nanoribbons.

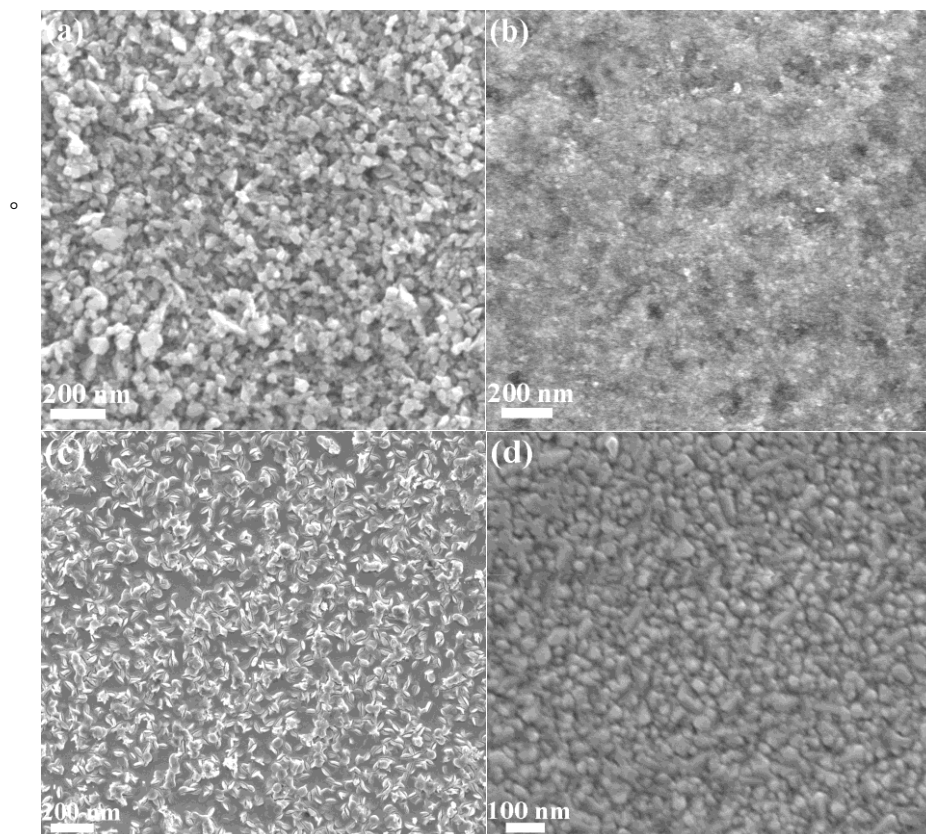

**Fig. SI4** SEM images of (a) In<sub>2</sub>O<sub>3</sub>, (b) ZnO, (c) TiO<sub>2</sub>, and (d) SnO<sub>2</sub> thin films, respectively.



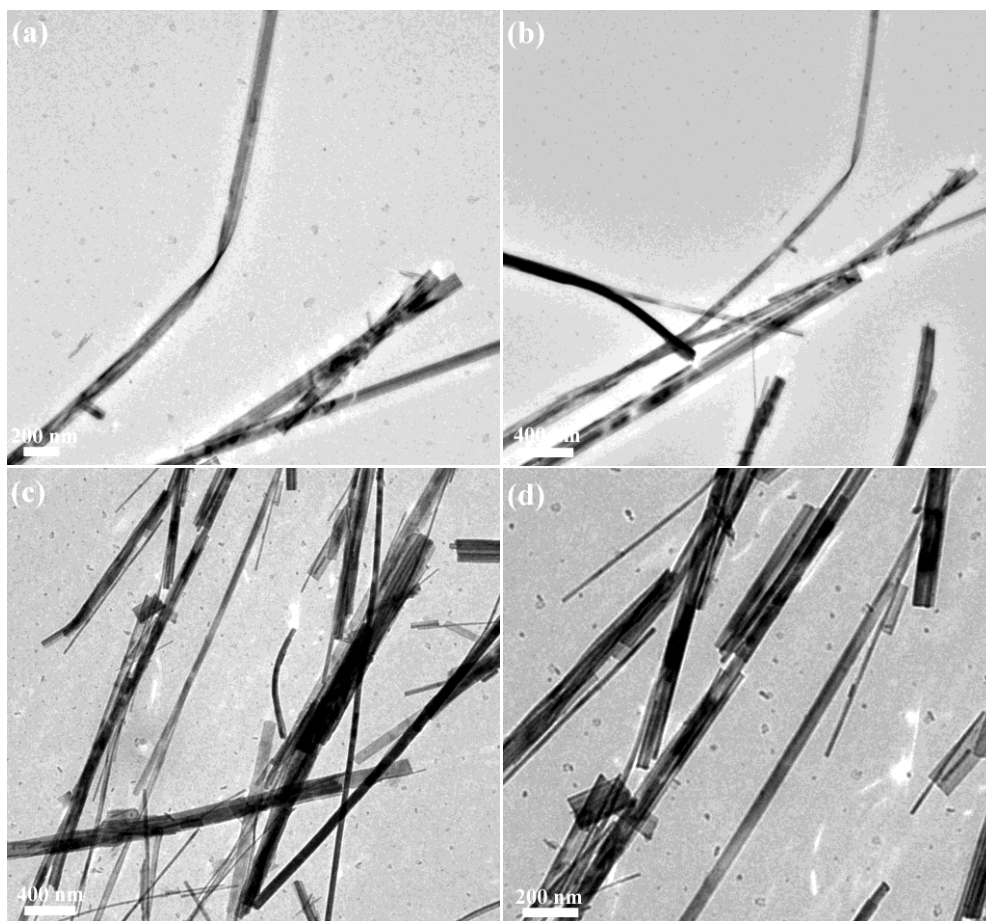

**Fig. SI5** ((a), (b), (c) and (d)) TEM images of CBS nanoribbons.

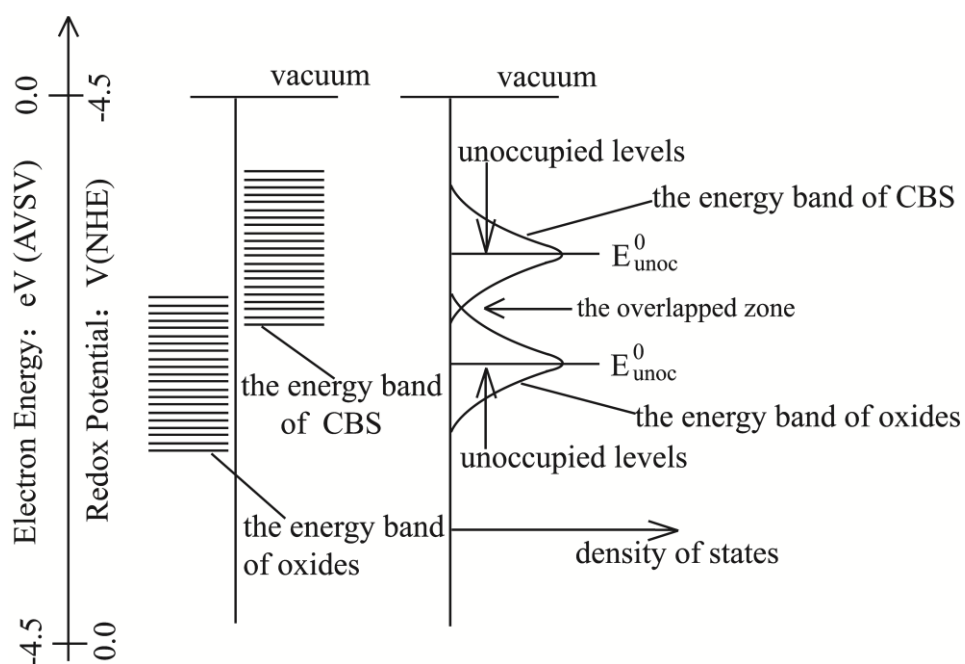

**Fig. SI6** The transport mechanism of photogenerated charges under zero and positive bias in four sensitized electrodes ( $E_c$ : the bottom of conduction band;  $E_v$ : the top of valence band;  $E_f$ : the Fermi energy level;  $\Delta E_c$ : the difference of conduction band edges at the interface;  $\Delta E_v$ : the difference of valence band edges at the interface;  $NHE$ : the normal hydrogen electrode;  $AVS$ : the absolute vacuum energy scale;  $h\nu$ : the energy of photon).

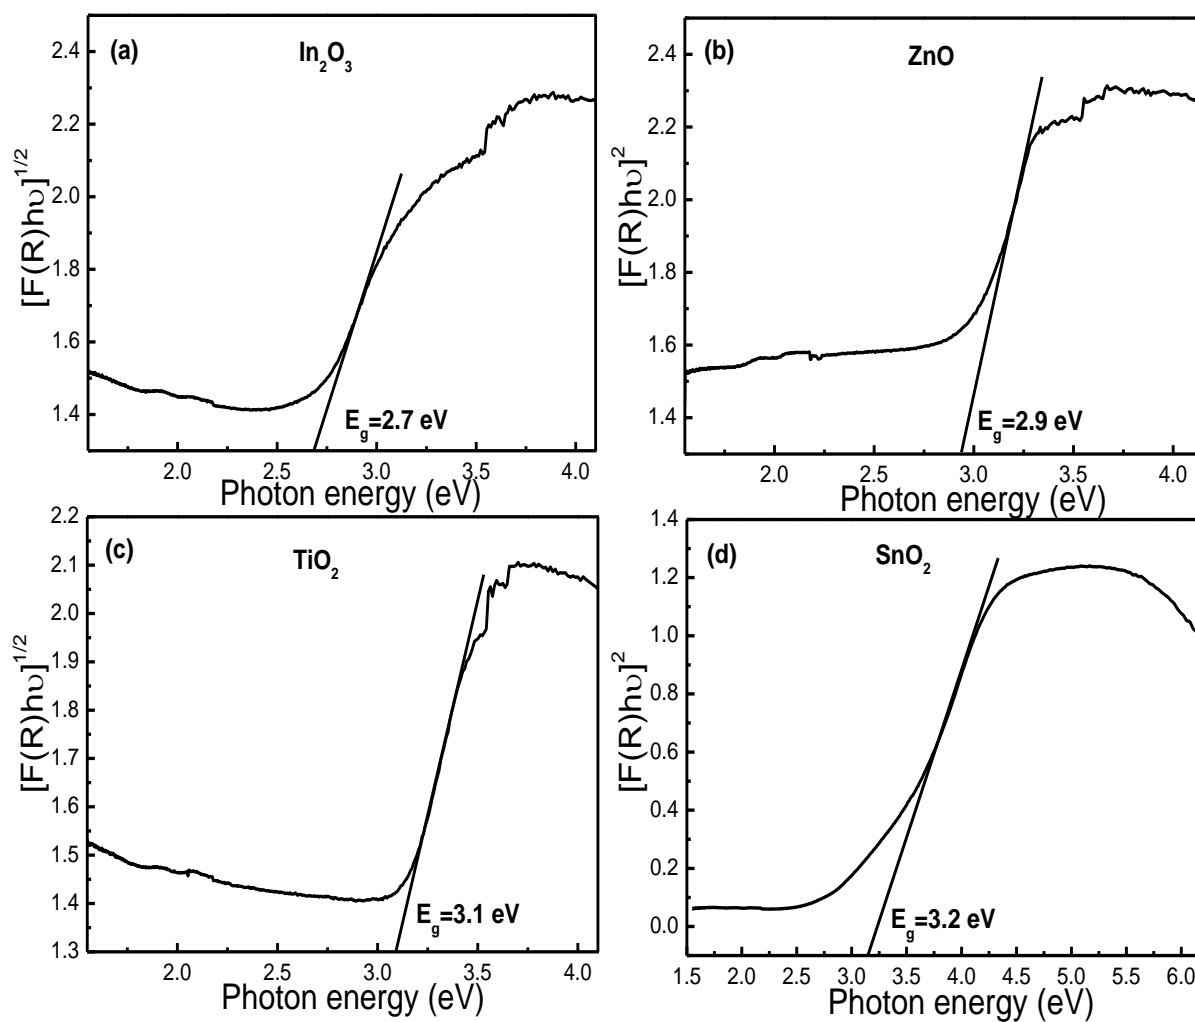

**Fig. SI7** The plots of  $F(R)h\nu$  against the photo energy about (a)  $\text{In}_2\text{O}_3$ , (b)  $\text{ZnO}$ , (c)  $\text{TiO}_2$ , and (d)  $\text{SnO}_2$ , respectively.
